# Supplementary material
Source: publisher figshare collection journal article supplement (https://gsajournals.figshare.com/articles/dataset/_/16455282)
Supplement: Supplementary file 1 [file 1]

**Table S4** Read counts in microbiome sample DO-358 broken down by observed SNP allele and by the genotypes of genomic DNA samples DO-358 and DO-344

| DO-358 genotype | DO-344 genotype | allele in DO-358 microbiome |         |         |         |
|-----------------|-----------------|-----------------------------|---------|---------|---------|
|                 |                 | A (%)                       |         | B (%)   |         |
| AA              | AA              | 2,394,215                   | (99.7%) | 6,050   | (0.3%)  |
| AA              | AB              | 869,613                     | (79.5%) | 224,483 | (20.5%) |
| AA              | BB              | 103,036                     | (59.1%) | 71,332  | (40.9%) |
| AB              | AA              | 686,970                     | (71.8%) | 269,447 | (28.2%) |
| AB              | AB              | 297,500                     | (51.4%) | 280,958 | (48.6%) |
| AB              | BB              | 55,982                      | (29.9%) | 131,111 | (70.1%) |
| BB              | AA              | 73,727                      | (42.9%) | 98,257  | (57.1%) |
| BB              | AB              | 47,000                      | (21.9%) | 167,513 | (78.1%) |
| BB              | BB              | 542                         | (0.5%)  | 117,802 | (99.5%) |
