# Supplementary material
Source: publisher figshare collection journal article supplement (https://gsajournals.figshare.com/articles/dataset/_/16455282)
Supplement: Supplementary file 2 [file 1]

**Table S1** Expected proportion of A microbiome reads, assuming it is a mixture of two genomic DNA samples, as function of the genotypes of the two samples.

| sample 1 genotype | sample 2 genotype | expected proportion of A allele     |
|-------------------|-------------------|-------------------------------------|
| AA                | AA                | $1 - \epsilon$                      |
| AA                | AB                | $(1 - p)(1 - \epsilon) + p/2$       |
| AA                | BB                | $(1 - p)(1 - \epsilon) + p\epsilon$ |
| AB                | AA                | $(1 - p)/2 + p(1 - \epsilon)$       |
| AB                | AB                | $1/2$                               |
| AB                | BB                | $(1 - p)/2 + p\epsilon$             |
| BB                | AA                | $(1 - p)\epsilon + p(1 - \epsilon)$ |
| BB                | AB                | $(1 - p)\epsilon + p/2$             |
| BB                | BB                | $\epsilon$                          |

$p$  is the proportion of the microbiome sample coming from genomic DNA sample 2.  
 $\epsilon$  is the rate of sequencing errors.
