# Supplementary material
Source: publisher figshare collection journal article supplement (https://gsajournals.figshare.com/articles/dataset/_/16455282)
Supplement: Supplementary file 4 [file 1]

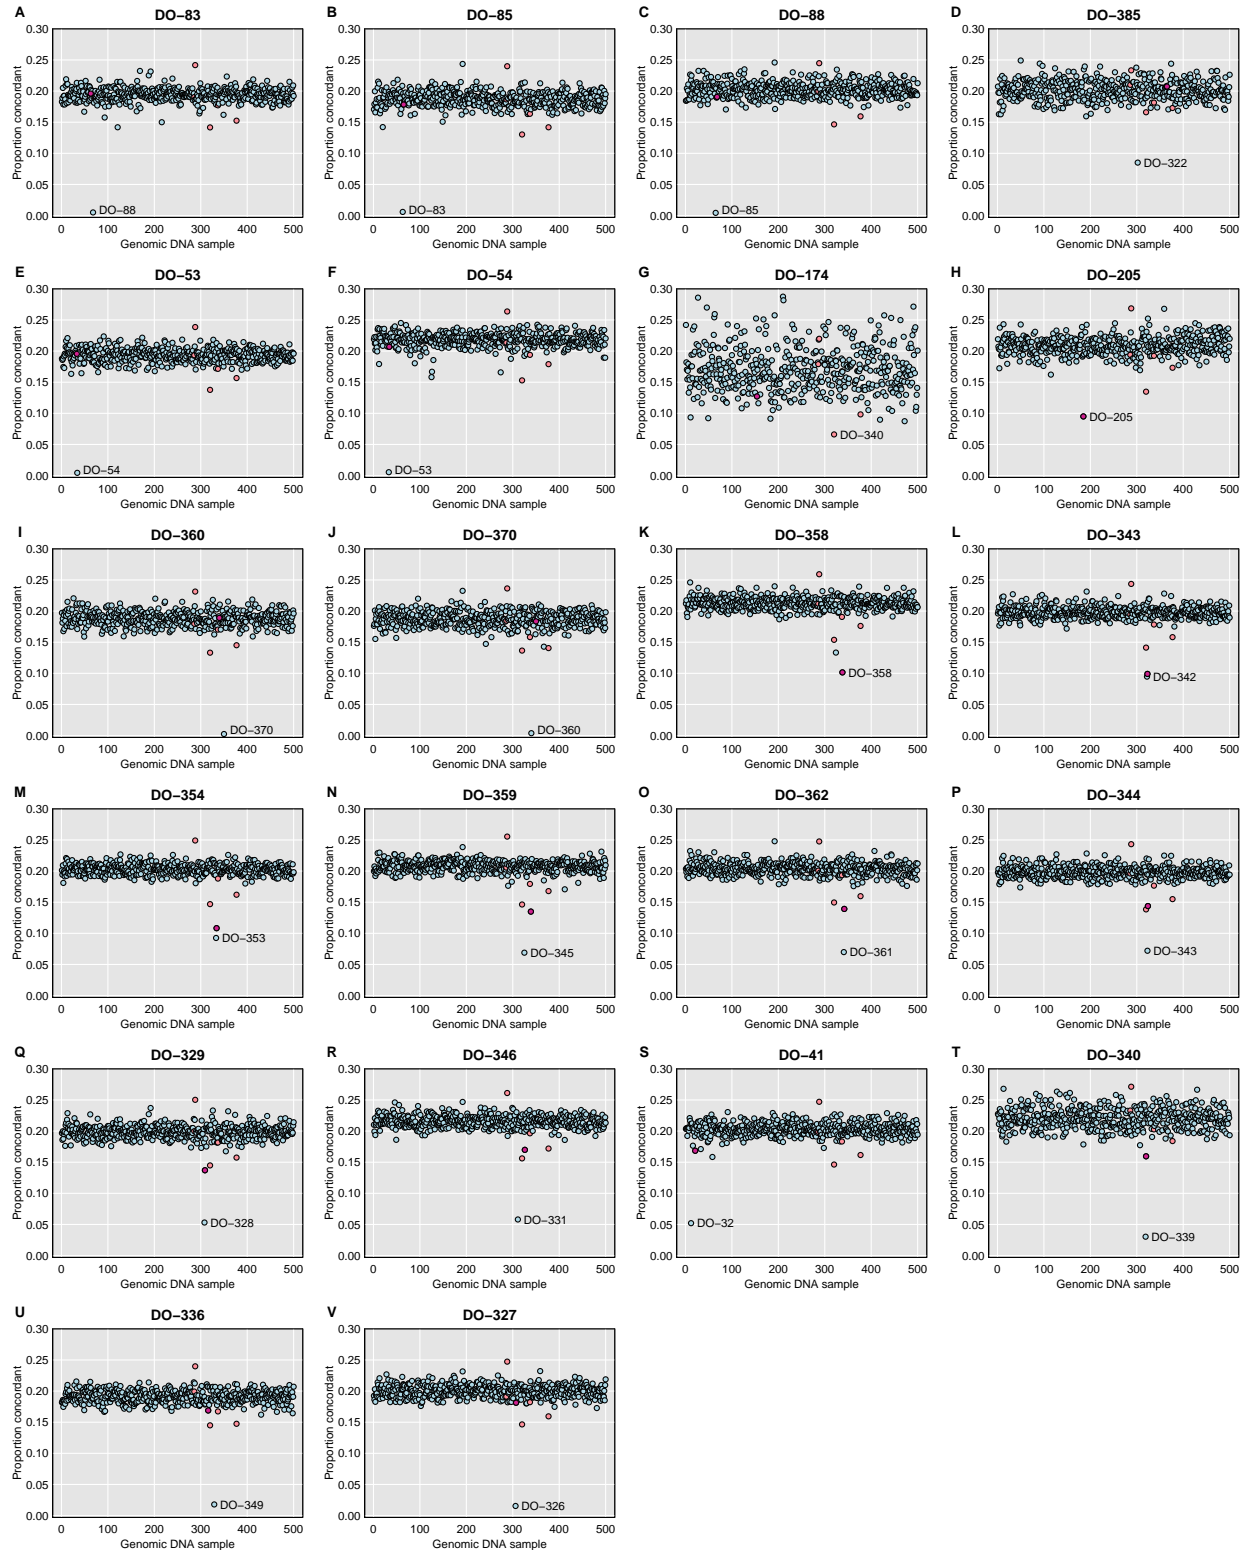

**Figure S2** For selected microbiome samples, plots of their distance to each genomic sample, with distance measured by taking, among reads that overlapped a SNP where the genotyped sample was homozygous, the proportion with an allele that was discordant with the inferred SNP genotype. The sample with what should be the correct label is highlighted in dark pink. A set of low-quality DNA samples are highlighted in pale pink.
