# Supplementary material
Source: publisher figshare collection journal article supplement (https://gsajournals.figshare.com/articles/dataset/_/16455282)
Supplement: Supplementary file 5 [file 1]

**Table S5** Read counts in microbiome sample DO-101 broken down by observed SNP allele and by the genotypes of genomic DNA samples DO-101 and DO-102

| DO-101 genotype | DO-102 genotype | allele in DO-101 microbiome |         |         |         |
|-----------------|-----------------|-----------------------------|---------|---------|---------|
|                 |                 | A (%)                       |         | B (%)   |         |
| AA              | AA              | 3,664,076                   | (99.6%) | 14,305  | (0.4%)  |
| AA              | AB              | 1,161,383                   | (99.5%) | 6,187   | (0.5%)  |
| AA              | BB              | 153,501                     | (99.3%) | 1,067   | (0.7%)  |
| AB              | AA              | 651,287                     | (52.0%) | 600,434 | (48.0%) |
| AB              | AB              | 378,800                     | (51.8%) | 352,828 | (48.2%) |
| AB              | BB              | 155,967                     | (51.2%) | 148,703 | (48.8%) |
| BB              | AA              | 3,088                       | (1.6%)  | 185,825 | (98.4%) |
| BB              | AB              | 3,210                       | (1.3%)  | 240,712 | (98.7%) |
| BB              | BB              | 2,162                       | (1.0%)  | 217,882 | (99.0%) |
