# Supplementary material
Source: publisher figshare collection journal article supplement (https://gsajournals.figshare.com/articles/dataset/_/16455282)
Supplement: Supplementary file 6 [file 1]

**Table S7** Read counts in microbiome sample DO-191 broken down by observed SNP allele and by the genotypes of genomic DNA samples DO-191 and DO-146

| DO-191 genotype | DO-146 genotype | allele in DO-191 microbiome |         |        |         |
|-----------------|-----------------|-----------------------------|---------|--------|---------|
|                 |                 | A (%)                       |         | B (%)  |         |
| AA              | AA              | 333,088                     | (99.4%) | 2,144  | (0.6%)  |
| AA              | AB              | 132,182                     | (85.7%) | 22,011 | (14.3%) |
| AA              | BB              | 19,120                      | (73.8%) | 6,772  | (26.2%) |
| AB              | AA              | 77,327                      | (67.0%) | 38,093 | (33.0%) |
| AB              | AB              | 43,599                      | (54.6%) | 36,208 | (45.4%) |
| AB              | BB              | 9,291                       | (37.7%) | 15,329 | (62.3%) |
| BB              | AA              | 5,343                       | (28.3%) | 13,556 | (71.7%) |
| BB              | AB              | 3,368                       | (14.7%) | 19,534 | (85.3%) |
| BB              | BB              | 88                          | (0.6%)  | 13,517 | (99.4%) |
