# Supplementary material
Source: publisher figshare collection journal article supplement (https://gsajournals.figshare.com/articles/dataset/_/16455282)
Supplement: Supplementary file 7 [file 1]

**Table S2** Read counts in microbiome sample DO-360 broken down by observed SNP allele and by the genotype of genomic DNA sample DO-360.

| DO-360 genotype | allele in DO-360 microbiome |         |           |         |
|-----------------|-----------------------------|---------|-----------|---------|
|                 | A (%)                       |         | B (%)     |         |
| AA              | 8,863,572                   | (85.4%) | 1,520,169 | (14.6%) |
| AB              | 2,870,063                   | (72.7%) | 1,075,126 | (27.3%) |
| BB              | 671,722                     | (55.6%) | 536,010   | (44.4%) |
