# Supplementary material
Source: publisher figshare collection journal article supplement (https://gsajournals.figshare.com/articles/dataset/_/16455282)
Supplement: Supplementary file 8 [file 1]

**Table S3** Read counts in microbiome sample DO-360 broken down by observed SNP allele and by the genotype of genomic DNA sample DO-370.

| DO-370 genotype | allele in DO-360 microbiome |         |           |         |
|-----------------|-----------------------------|---------|-----------|---------|
|                 | A (%)                       |         | B (%)     |         |
| AA              | 10,324,265                  | (99.8%) | 23,256    | (0.2%)  |
| AB              | 2,083,947                   | (51.2%) | 1,986,380 | (48.8%) |
| BB              | 5,347                       | (0.5%)  | 1,117,994 | (99.5%) |
