# Supplementary material
Source: publisher figshare collection journal article supplement (https://gsajournals.figshare.com/articles/dataset/_/16455282)
Supplement: Supplementary file 9 [file 1]

**Table S6** Read counts in microbiome sample DO-111 broken down by observed SNP allele and by the genotypes of genomic DNA samples DO-111 and DO-112

| DO-111 genotype | DO-112 genotype | allele in DO-111 microbiome |         |         |         |
|-----------------|-----------------|-----------------------------|---------|---------|---------|
|                 |                 | A (%)                       |         | B (%)   |         |
| AA              | AA              | 1,378,006                   | (99.6%) | 5,121   | (0.4%)  |
| AA              | AB              | 352,914                     | (92.7%) | 27,682  | (7.3%)  |
| AA              | BB              | 25,268                      | (85.8%) | 4,180   | (14.2%) |
| AB              | AA              | 337,647                     | (59.3%) | 231,369 | (40.7%) |
| AB              | AB              | 202,368                     | (52.2%) | 185,606 | (47.8%) |
| AB              | BB              | 33,524                      | (44.3%) | 42,090  | (55.7%) |
| BB              | AA              | 21,171                      | (17.0%) | 103,638 | (83.0%) |
| BB              | AB              | 9,266                       | (8.8%)  | 96,292  | (91.2%) |
| BB              | BB              | 768                         | (1.0%)  | 77,959  | (99.0%) |
