# Supplementary material
Source: publisher figshare collection journal article supplement (https://gsajournals.figshare.com/articles/dataset/_/16455282)
Supplement: Supplementary file 11 [file 1]

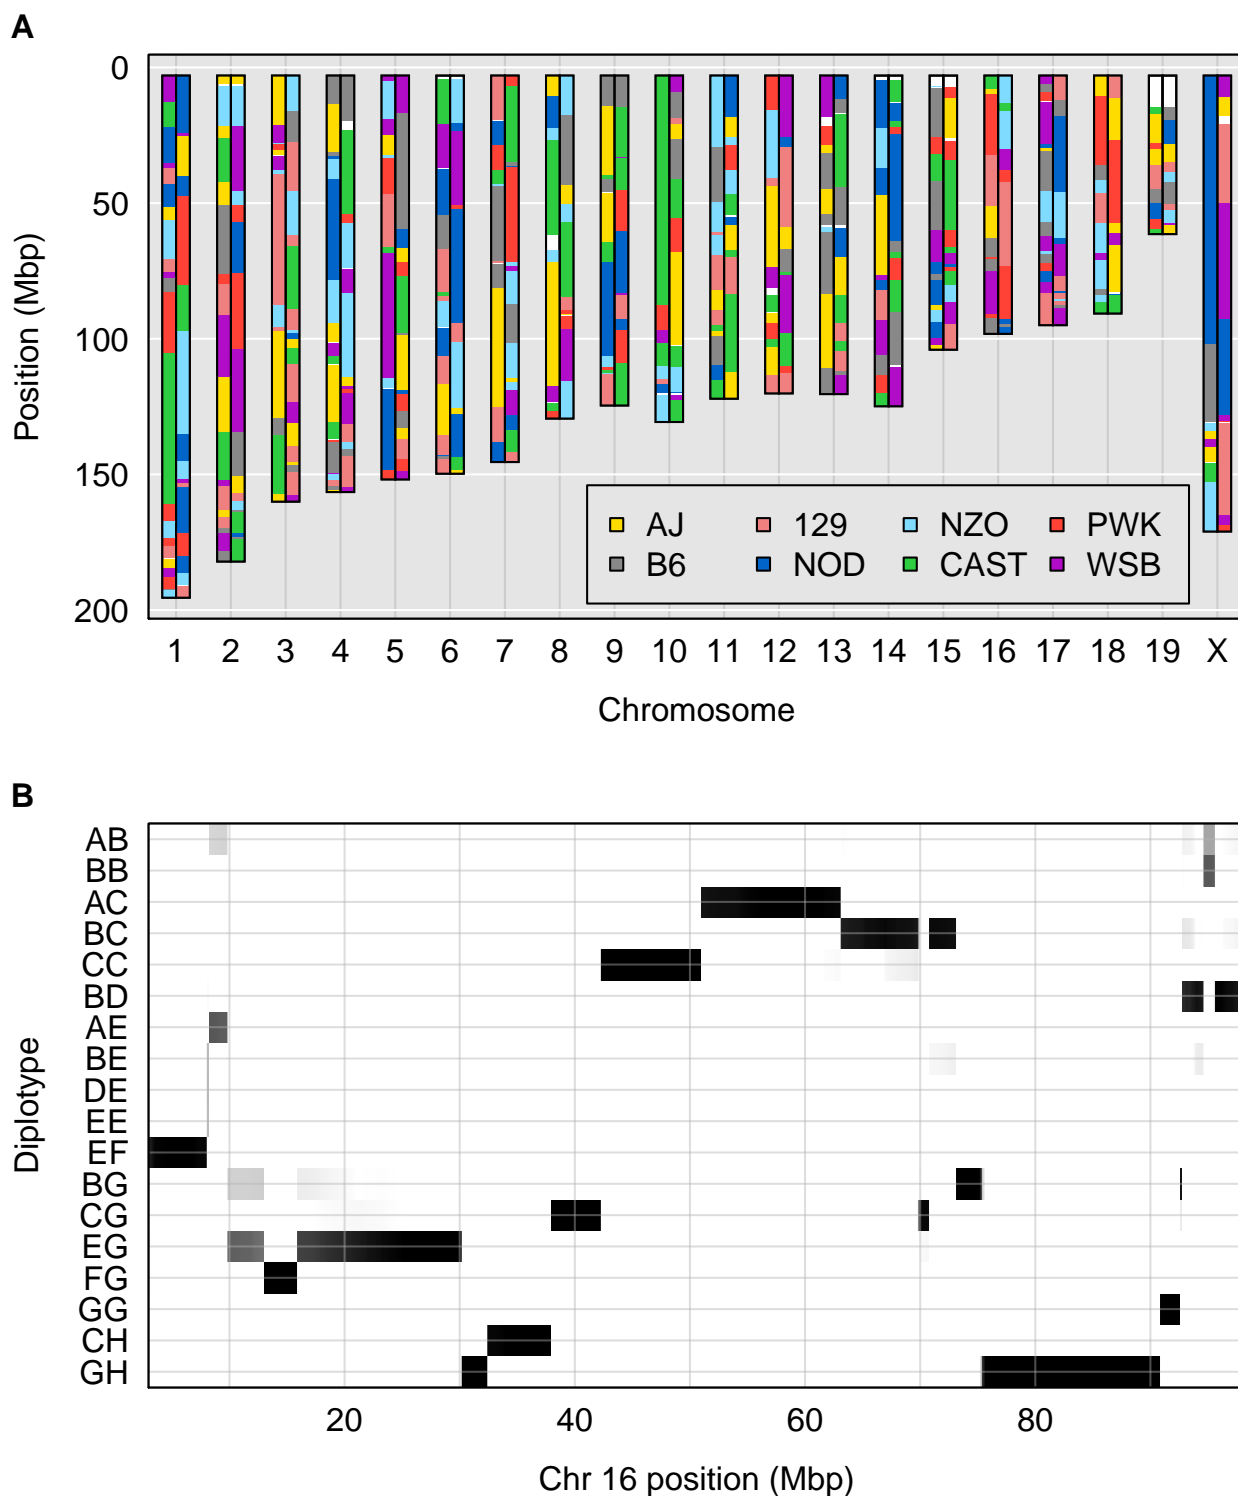

**Figure S1** Illustration of genome reconstruction. **A:** Inferred diplotype across the genome for mouse DO-359, with an arbitrary choice of phase. (For example, if there is a region of homozygosity, the haplotypes above can be swapped relative to the haplotypes below.) White indicates unknown (no diplotype had probability  $>0.5$ ). **B:** Heat map of the diplotype probabilities for mouse DO-359 along chromosome 16. Only diplotypes that achieved probability  $>0.25$  are shown.
